# Supplementary material for: Transcriptomic Profiling of In Vitro Tumor-Stromal Cell Paracrine Crosstalk Identifies Involvement of the Integrin Signaling Pathway in the Pathogenesis of Mesenteric Fibrosis in Human Small Intestinal Neuroendocrine Neoplasms
Source: Front Oncol. 2021 Feb 24;11:629665. doi: 10.3389/fonc.2021.629665 (PMC7943728; doi:10.3389/fonc.2021.629665)
Supplement: Supplementary Table 12 — Differentially expressed genes (upregulated) in HEK293 cells exposed to P-STS conditioned media using RNA sequencing analysis. [file Table_12.xlsx]

## Sheet: Table S12
Id	4_HEK_SFM1	5_HEK_SFM2	6_HEK_SFM3	1_HEK_CM1	2_HEK_CM2	3_HEK_CM3	7_HEK_KCM1	8_HEK_KCM2	9_HEK_KCM3	10_HEK_PCM1	11_HEK_PCM2	12_HEK_PCM3	norm.4_HEK_SFM1	norm.5_HEK_SFM2	norm.6_HEK_SFM3	norm.1_HEK_CM1	norm.2_HEK_CM2	norm.3_HEK_CM3	norm.7_HEK_KCM1	norm.8_HEK_KCM2	norm.9_HEK_KCM3	norm.10_HEK_PCM1	norm.11_HEK_PCM2	norm.12_HEK_PCM3	baseMean	HEK_SFM	HEK_CM	HEK_KCM	HEK_PCM	FoldChange	log2FoldChange	pvalue	padj	dispGeneEst	dispFit	dispMAP	dispersion	betaConv	maxCooks
EEF1B2	9595	8125	8860	4888	10594	9105	5548	6002	5778	9110	12616	13526	7657	7617	7593	8137	8257	8290	8126	8416	8379	8548	8893	8739	8221.06	7622	8228	8307	8727	1.145	0.196	6.05889e-10	8.9405e-07	0.0001	0.0013	0.0006	0.0006	TRUE	0.0022
PRDX1	10779	9081	10304	4016	8417	7067	6246	6231	6485	10395	13860	15632	8602	8513	8831	6686	6560	6435	9148	8737	9405	9753	9769	10100	8544.93	8649	6560	9097	9874	1.142	0.191	1.24149e-07	7.04591e-05	0.0004	0.0013	0.0009	0.0009	TRUE	0.0073
RAN	12521	10482	11426	5920	12992	11063	7402	7703	7607	11625	15420	17012	9992	9827	9792	9856	10126	10073	10841	10801	11032	10907	10869	10992	10425.7	9870	10018	10891	10923	1.107	0.146	5.48844e-07	0.000227425	0	0.0013	0.0005	0.0005	TRUE	0.0011
TPT1	16728	14092	15334	8067	17705	15145	10323	10749	10480	15246	21021	22979	13349	13211	13142	13430	13799	13790	15120	15072	15198	14305	14817	14847	14173.3	13234	13673	15130	14656	1.108	0.148	5.54846e-07	0.000227425	0.0001	0.0012	0.0006	0.0006	TRUE	0.0026
TXN	7321	6123	6734	2718	5939	4910	4158	4345	4286	6690	9344	10311	5842	5740	5771	4525	4629	4471	6090	6092	6216	6277	6586	6662	5741.8	5784	4542	6133	6508	1.126	0.171	1.35694e-06	0.000422904	0.0003	0.0014	0.0008	0.0008	TRUE	0.0057
UBB	13633	11652	12681	7024	15007	12550	8290	8693	8557	12918	16977	18314	10879	10924	10868	11693	11696	11427	12142	12189	12410	12121	11967	11833	11679	10890	11605	12247	11974	1.099	0.137	2.14389e-06	0.000608371	0	0.0013	0.0005	0.0005	TRUE	0.0011
NANS	1266	965	1126	537	1075	931	751	777	729	1211	1683	1755	1010	905	965	894	838	848	1100	1089	1057	1136	1186	1134	1013.55	960	860	1082	1152	1.199	0.262	5.36544e-06	0.00127698	0	0.0024	0.0016	0.0016	TRUE	0.0148
UCHL1	4548	3705	4434	2105	4324	3851	2737	2681	2700	4483	5831	6418	3629	3473	3800	3504	3370	3506	4009	3759	3916	4206	4110	4147	3785.87	3634	3460	3895	4154	1.143	0.192	5.3341e-06	0.00127698	0.0005	0.0015	0.0011	0.0011	TRUE	0.0096
SNRPC	2000	1677	1826	972	2054	1671	1187	1189	1219	1891	2658	2845	1596	1572	1565	1618	1601	1522	1739	1667	1768	1774	1874	1838	1677.77	1578	1580	1725	1829	1.16	0.214	6.45903e-06	0.00144408	0	0.0019	0.0011	0.0011	TRUE	0.0066
ERH	3772	3173	3391	1684	3604	3123	2271	2479	2312	3477	4766	5119	3010	2975	2906	2803	2809	2844	3326	3476	3353	3262	3359	3307	3119.27	2964	2819	3385	3309	1.117	0.16	2.94885e-05	0.00483481	0	0.0015	0.0008	0.0008	TRUE	0.0034
ALG5	564	467	488	215	473	412	372	351	337	612	730	847	450	438	418	358	369	375	545	492	489	574	515	547	464.13	435	367	509	545	1.25	0.322	3.03073e-05	0.00486103	0	0.0038	0.0026	0.0026	TRUE	0.022
ATP6V1G1	2656	2253	2499	1165	2631	2237	1583	1718	1702	2495	3383	3893	2119	2112	2142	1939	2051	2037	2319	2409	2468	2341	2385	2515	2236.41	2124	2009	2399	2414	1.137	0.185	4.20567e-05	0.0060842	0.0004	0.0017	0.0011	0.0011	TRUE	0.0085
ILF2	8573	7046	7810	3535	7921	6532	4726	5242	4748	7760	10635	11774	6841	6606	6693	5885	6174	5948	6922	7350	6886	7281	7496	7607	6807.4	6713	6002	7053	7461	1.112	0.153	4.9627e-05	0.00678052	0.0005	0.0013	0.0009	0.0009	TRUE	0.0083
PPT1	4714	3909	4320	1908	4135	3761	2625	2754	2692	4308	5929	6489	3762	3665	3702	3176	3223	3425	3845	3862	3904	4042	4179	4193	3748.06	3710	3275	3870	4138	1.116	0.158	5.05751e-05	0.00678442	0.0003	0.0015	0.0009	0.0009	TRUE	0.0099
CALM2	6259	5087	5825	2764	6223	5183	3605	3678	3751	5785	7628	8764	4995	4769	4992	4601	4850	4719	5280	5157	5440	5428	5377	5663	5105.92	4919	4723	5292	5489	1.116	0.158	5.27263e-05	0.00682482	0.0004	0.0014	0.0009	0.0009	TRUE	0.0048
CCT5	11650	9441	10533	5069	11247	9616	6190	6663	6414	10552	13952	15642	9297	8851	9027	8439	8766	8756	9066	9343	9302	9901	9834	10107	9223.92	9058	8654	9237	9947	1.098	0.135	5.25262e-05	0.00682482	0.0002	0.0013	0.0007	0.0007	TRUE	0.0033
FAIM	870	722	784	309	687	585	507	496	532	839	1170	1271	694	677	672	514	535	533	743	695	772	787	825	821	689.02	681	527	737	811	1.192	0.253	6.00818e-05	0.00764282	0	0.0029	0.0018	0.0018	TRUE	0.0141
KRTCAP2	1310	1122	1206	615	1192	998	834	853	752	1331	1731	1856	1045	1052	1034	1024	929	909	1222	1196	1091	1249	1220	1199	1097.39	1044	954	1170	1223	1.171	0.228	7.71808e-05	0.00918451	0.0005	0.0023	0.0017	0.0017	TRUE	0.0205
TSPAN3	5470	4608	4859	2923	6403	5511	3347	3497	3379	4950	6889	7242	4365	4320	4164	4866	4990	5018	4902	4903	4900	4644	4856	4679	4717.44	4283	4958	4902	4726	1.104	0.142	9.02814e-05	0.0100924	0.0002	0.0014	0.0008	0.0008	TRUE	0.0036
MPDU1	835	689	752	348	731	621	490	476	504	861	1094	1163	666	646	644	579	570	565	718	667	731	808	771	751	676.48	652	571	705	777	1.189	0.249	0.000102936	0.0110067	0	0.0029	0.0018	0.0018	TRUE	0.0131
PCNA	4413	3654	3969	1871	4163	3465	2650	2784	2617	3975	5497	5948	3522	3426	3402	3115	3245	3155	3881	3904	3795	3730	3875	3843	3574.23	3450	3172	3860	3816	1.107	0.146	0.000109117	0.0114132	0	0.0015	0.0008	0.0008	TRUE	0.0026
COX7B	2030	1605	1781	759	1639	1270	1149	1229	1170	1849	2628	2716	1620	1505	1526	1264	1277	1156	1683	1723	1697	1735	1852	1755	1566.11	1550	1232	1701	1781	1.149	0.2	0.000140717	0.0139832	0.0009	0.0019	0.0015	0.0015	TRUE	0.0189
DBI	1186	923	1112	370	781	580	592	700	704	1178	1604	1671	946	865	953	616	609	528	867	982	1021	1105	1131	1080	891.89	921	584	957	1105	1.198	0.261	0.000139018	0.0139832	0.0025	0.0025	0.0026	0.0026	TRUE	0.044
RPL36AL	2736	2385	2597	1372	2664	2299	1643	1693	1677	2673	3533	3802	2183	2236	2226	2284	2076	2093	2406	2374	2432	2508	2490	2457	2313.82	2215	2151	2404	2485	1.122	0.166	0.000161489	0.0152752	0.0002	0.0017	0.001	0.001	TRUE	0.0151
SOD1	5667	4705	5404	2366	5241	4239	3306	3309	3328	5385	7146	7589	4522	4411	4631	3939	4085	3860	4842	4640	4826	5053	5037	4903	4562.43	4521	3961	4769	4998	1.105	0.144	0.000163664	0.015285	0.0004	0.0014	0.0009	0.0009	TRUE	0.005
CCT7	13158	11094	12412	5413	11754	10341	7391	7523	7662	12234	16333	17519	10500	10400	10637	9011	9161	9416	10825	10548	11112	11479	11513	11319	10493.5	10512	9196	10828	11437	1.088	0.121	0.000166563	0.0153612	0.0002	0.0013	0.0007	0.0007	TRUE	0.0032
HMGB3	1985	1668	1848	890	1868	1559	1190	1295	1208	1856	2513	2804	1584	1564	1584	1482	1456	1420	1743	1816	1752	1741	1771	1812	1643.64	1577	1453	1770	1775	1.126	0.171	0.000177857	0.01581	0	0.0019	0.001	0.001	TRUE	0.0031
CKS2	2365	2126	2258	903	1849	1510	1441	1554	1477	2377	3104	3302	1887	1993	1935	1503	1441	1375	2111	2179	2142	2230	2188	2133	1926.5	1938	1440	2144	2184	1.126	0.172	0.000194875	0.0169152	0.0002	0.0018	0.0011	0.0011	TRUE	0.009
HN1	2456	2032	2197	1166	2350	1942	1463	1458	1512	2304	3158	3269	1960	1905	1883	1941	1832	1768	2143	2044	2193	2162	2226	2112	2014.04	1916	1847	2127	2167	1.131	0.177	0.000205419	0.017623	0.0005	0.0018	0.0012	0.0012	TRUE	0.0101
CD44	4242	3588	3831	2074	4439	3730	2276	2611	2326	3841	5354	5883	3385	3364	3283	3453	3460	3396	3334	3661	3373	3604	3774	3801	3490.63	3344	3436	3456	3726	1.115	0.157	0.000215837	0.018096	0.0005	0.0015	0.0011	0.0011	TRUE	0.0164
TXNDC12	2017	1650	1732	953	2031	1810	1180	1267	1161	1902	2515	2640	1610	1547	1484	1587	1583	1648	1728	1777	1684	1785	1773	1706	1659.17	1547	1606	1730	1755	1.133	0.18	0.000232577	0.0190662	0	0.0019	0.0012	0.0012	TRUE	0.0078
SBDS	1764	1457	1656	835	1661	1470	969	1104	997	1728	2291	2389	1408	1366	1419	1390	1295	1338	1419	1548	1446	1621	1615	1544	1450.74	1398	1341	1471	1593	1.139	0.188	0.000236859	0.0192038	0.0003	0.002	0.0013	0.0013	TRUE	0.0126
POP7	1437	1253	1400	626	1250	1017	945	910	990	1517	1928	2022	1147	1175	1200	1042	974	926	1384	1276	1436	1423	1359	1306	1220.69	1174	981	1365	1363	1.16	0.214	0.00025359	0.0203368	0.0011	0.0021	0.0018	0.0018	TRUE	0.0198
GLA	1274	1029	1255	659	1500	1265	760	769	795	1236	1703	1806	1017	965	1076	1097	1169	1152	1113	1078	1153	1160	1200	1167	1112.19	1019	1139	1115	1176	1.154	0.206	0.00026266	0.0206684	0.0003	0.0022	0.0016	0.0016	TRUE	0.0139
ANXA2	3361	2800	2930	1541	3193	2748	1829	1867	1892	3132	4108	4406	2682	2625	2511	2565	2489	2502	2679	2618	2744	2939	2896	2847	2674.66	2606	2519	2680	2894	1.11	0.15	0.000304894	0.0229542	0	0.0016	0.001	0.001	TRUE	0.0062
ARPC3	2218	1783	2047	1055	2258	1826	1282	1365	1278	2013	2802	3048	1770	1672	1754	1756	1760	1663	1878	1914	1853	1889	1975	1969	1821.07	1732	1726	1882	1944	1.123	0.167	0.000345588	0.0254975	0	0.0018	0.0011	0.0011	TRUE	0.0067
KPNA2	7453	6227	6839	2792	6344	5211	3789	4214	3941	6990	9037	9912	5947	5838	5861	4648	4944	4745	5550	5909	5715	6559	6370	6404	5707.51	5882	4779	5725	6444	1.095	0.131	0.000357842	0.0258839	0.0003	0.0014	0.0008	0.0008	TRUE	0.0058
NDUFS5	3384	2884	3155	1379	2886	2394	1944	1999	2138	3204	4219	4719	2700	2704	2704	2296	2249	2180	2847	2803	3101	3006	2974	3049	2717.74	2703	2242	2917	3010	1.114	0.155	0.000354659	0.0258839	0.0004	0.0016	0.0011	0.0011	TRUE	0.0183
GTF3C6	1204	965	1101	525	1036	817	680	749	762	1164	1509	1731	961	905	944	874	807	744	996	1050	1105	1092	1064	1118	971.66	937	808	1050	1091	1.165	0.221	0.000368593	0.0264027	0.0011	0.0024	0.002	0.002	TRUE	0.028
ASF1B	1132	1004	1086	529	1070	922	723	724	746	1117	1508	1649	903	941	931	881	834	840	1059	1015	1082	1048	1063	1065	971.82	925	852	1052	1059	1.146	0.196	0.000379625	0.026675	0	0.0024	0.0014	0.0014	TRUE	0.0056
HSP90AA1	33205	26763	29953	11412	26534	22076	17306	18981	16992	30388	39039	45925	26497	25090	25671	18998	20681	20101	25347	26614	24642	28512	27517	29673	24945.4	25753	19927	25534	28567	1.109	0.15	0.000442192	0.0302083	0.0013	0.0012	0.0013	0.0013	TRUE	0.0099
DNAJA1	3224	2599	3018	1138	2447	2114	1876	1973	1800	2976	3874	4572	2573	2437	2587	1895	1907	1925	2748	2766	2610	2792	2731	2954	2493.66	2532	1909	2708	2826	1.116	0.159	0.000496743	0.032723	0.0007	0.0016	0.0012	0.0012	TRUE	0.01
SKP1	2792	2432	2604	1190	2681	2068	1562	1773	1626	2640	3550	3987	2228	2280	2232	1981	2090	1883	2288	2486	2358	2477	2502	2576	2281.72	2247	1985	2377	2518	1.122	0.166	0.000508209	0.033182	0.0008	0.0017	0.0013	0.0013	TRUE	0.015
CNIH4	1675	1423	1495	901	2048	1673	1002	1068	1044	1537	2106	2355	1337	1334	1281	1500	1596	1523	1468	1498	1514	1442	1484	1522	1458.23	1317	1540	1493	1483	1.127	0.172	0.000533478	0.0337874	0	0.002	0.0012	0.0012	TRUE	0.0066
RPS15A	18264	15865	16985	8865	20327	16843	11192	12189	11769	16751	22932	24588	14574	14873	14557	14758	15843	15336	16392	17091	17068	15717	16164	15887	15688.4	14668	15312	16850	15923	1.086	0.119	0.000532266	0.0337874	0.0004	0.0012	0.0008	0.0008	TRUE	0.0059
CACYBP	2236	1934	2064	1116	2182	1834	1280	1371	1334	2094	2836	3159	1784	1813	1769	1858	1701	1670	1875	1922	1935	1965	1999	2041	1860.95	1789	1743	1911	2002	1.12	0.163	0.000553555	0.0343204	0.0002	0.0018	0.0012	0.0012	TRUE	0.0169
CALR	11609	10318	11122	4442	9428	7804	6960	7345	7248	10904	14700	15734	9264	9673	9532	7395	7348	7106	10194	10299	10511	10231	10362	10166	9340.03	9490	7283	10335	10253	1.081	0.112	0.000567587	0.0346034	0.0002	0.0013	0.0007	0.0007	TRUE	0.0028
COX6B1	2130	1829	1954	1064	2212	1926	1229	1307	1320	2013	2814	2829	1700	1715	1675	1771	1724	1754	1800	1833	1914	1889	1984	1828	1798.76	1697	1750	1849	1900	1.12	0.164	0.00057688	0.0346034	0	0.0018	0.0012	0.0012	TRUE	0.0093
SCFD1	1138	931	966	590	1216	1035	604	642	641	1066	1434	1522	908	873	828	982	948	942	885	900	930	1000	1011	983	932.5	870	957	905	998	1.147	0.198	0.000574394	0.0346034	0	0.0025	0.0015	0.0015	TRUE	0.0107
SEC11C	514	462	502	200	446	358	294	340	345	583	730	748	410	433	430	333	348	326	431	477	500	547	515	483	436.05	424	336	469	515	1.211	0.276	0.000597936	0.0352926	0	0.0039	0.0029	0.0029	TRUE	0.0291
AHSA1	2873	2446	2844	1002	2302	1913	1646	1611	1614	2794	3624	4103	2293	2293	2437	1668	1794	1742	2411	2259	2341	2622	2554	2651	2255.39	2341	1735	2337	2609	1.114	0.156	0.000603371	0.0353307	0.0005	0.0017	0.0012	0.0012	TRUE	0.0079
ATF4	8787	7600	8578	8074	16554	14146	6061	6242	6164	8116	11225	12026	7012	7125	7352	13441	12902	12881	8877	8752	8939	7615	7912	7770	9214.89	7163	13075	8856	7766	1.084	0.117	0.00064386	0.0371125	0.0002	0.0013	0.0007	0.0007	TRUE	0.0035
BTF3	15090	12481	13333	8002	16445	14139	8933	9564	8897	13206	18550	19692	12042	11701	11427	13322	12817	12874	13084	13410	12903	12391	13075	12723	12647.4	11723	13004	13132	12730	1.086	0.119	0.00067705	0.0384252	0.0004	0.0013	0.0008	0.0008	TRUE	0.0035
PSMC3	3132	2717	3022	1557	3215	2805	1968	1887	1950	3085	4028	4234	2499	2547	2590	2592	2506	2554	2882	2646	2828	2895	2839	2736	2676.17	2545	2551	2785	2823	1.108	0.149	0.000675647	0.0384252	0.0004	0.0016	0.0011	0.0011	TRUE	0.0117
ATP1B3	2922	2381	2730	1282	2813	2299	1649	1685	1637	2708	3589	3932	2332	2232	2340	2134	2192	2093	2415	2363	2374	2541	2530	2541	2340.55	2301	2140	2384	2537	1.102	0.14	0.000711273	0.0394569	0	0.0017	0.0009	0.0009	TRUE	0.0041
PDCD5	1656	1395	1603	860	1743	1504	956	1039	1071	1578	2143	2351	1321	1308	1374	1432	1358	1369	1400	1457	1553	1481	1511	1519	1423.6	1334	1386	1470	1504	1.127	0.173	0.000709625	0.0394569	0.0001	0.002	0.0013	0.0013	TRUE	0.0145
PRDX4	4056	3380	3897	1404	3341	2785	2321	2385	2387	3746	5160	5621	3237	3169	3340	2337	2604	2536	3399	3344	3462	3515	3637	3632	3184.28	3249	2492	3402	3595	1.107	0.146	0.000740734	0.0407846	0.0006	0.0015	0.0011	0.0011	TRUE	0.0155
CLTA	1590	1392	1447	901	1766	1448	940	925	985	1564	2053	2201	1269	1305	1240	1500	1376	1318	1377	1297	1428	1467	1447	1422	1370.64	1271	1398	1367	1445	1.137	0.185	0.000790236	0.0425952	0.0008	0.002	0.0016	0.0016	TRUE	0.0205
PSMA6	1708	1436	1586	777	1723	1444	1005	1099	1027	1646	2106	2355	1363	1346	1359	1294	1343	1315	1472	1541	1489	1544	1484	1522	1422.71	1356	1317	1501	1517	1.118	0.161	0.000781363	0.0425952	0	0.002	0.0011	0.0011	TRUE	0.0033
RPN1	7191	5924	6460	3113	6441	5537	4229	4303	4063	6387	8828	9372	5738	5554	5536	5182	5020	5042	6194	6033	5892	5993	6223	6055	5705.27	5609	5081	6040	6090	1.086	0.119	0.00083845	0.0446718	0.0002	0.0014	0.0008	0.0008	TRUE	0.003
PTTG1IP	2269	1984	2180	1241	2489	2344	1549	1541	1520	2199	2894	3199	1811	1860	1868	2066	1940	2134	2269	2161	2204	2063	2040	2067	2040.26	1846	2047	2211	2057	1.114	0.156	0.000847855	0.044682	0.0004	0.0018	0.0012	0.0012	TRUE	0.0145
MRPL15	1236	1013	1132	574	1326	1096	687	770	767	1170	1596	1683	986	950	970	956	1033	998	1006	1080	1112	1098	1125	1087	1033.46	969	996	1066	1103	1.139	0.187	0.000867655	0.0453324	0	0.0023	0.0015	0.0015	TRUE	0.0141
OST4	1292	1095	1210	602	1137	943	818	836	918	1311	1708	1771	1031	1027	1037	1002	886	859	1198	1172	1331	1230	1204	1144	1093.45	1032	916	1234	1193	1.155	0.208	0.000872485	0.0453324	0.0019	0.0023	0.0021	0.0021	TRUE	0.0337
STMN1	5953	4724	5161	2621	5898	5058	3302	3704	3155	5281	7305	7830	4750	4429	4423	4363	4597	4606	4836	5194	4575	4955	5149	5059	4744.72	4534	4522	4868	5054	1.115	0.157	0.000904036	0.0463193	0.0014	0.0014	0.0014	0.0014	TRUE	0.0209
POMP	1633	1374	1501	564	1379	1173	887	975	963	1537	2031	2369	1303	1288	1286	939	1075	1068	1299	1367	1397	1442	1432	1531	1285.55	1292	1027	1354	1468	1.137	0.185	0.000911978	0.0464039	0.0009	0.0021	0.0016	0.0016	TRUE	0.027
DYNLL1	1903	1697	1810	980	2046	1620	1072	1250	1165	1833	2622	2653	1519	1591	1551	1631	1595	1475	1570	1753	1690	1720	1848	1714	1638.04	1554	1567	1671	1761	1.134	0.182	0.00093657	0.0467378	0.0014	0.0019	0.0017	0.0017	TRUE	0.0166
PLP2	3315	2750	2913	2231	4258	3674	2105	2144	2074	3006	4239	4361	2645	2578	2497	3714	3319	3345	3083	3006	3008	2820	2988	2818	2985.11	2573	3459	3032	2875	1.118	0.16	0.000940965	0.0467378	0.0011	0.0016	0.0014	0.0014	TRUE	0.0231
UQCR10	1326	1189	1277	612	1209	935	832	910	850	1317	1829	1886	1058	1115	1094	1019	942	851	1219	1276	1233	1236	1289	1219	1129.21	1089	937	1243	1248	1.146	0.197	0.000951289	0.0467397	0.0012	0.0022	0.0019	0.0019	TRUE	0.0379
PTGES3	9426	7974	8679	3875	8603	7315	5153	5593	5340	8602	11195	12763	7522	7476	7438	6451	6705	6661	7547	7842	7744	8071	7891	8246	7466.22	7479	6606	7711	8069	1.079	0.11	0.000991821	0.0474217	0.0002	0.0013	0.0007	0.0007	TRUE	0.0023
UQCRH	5465	4495	5306	2666	5661	4741	3308	3437	3416	5042	6832	7354	4361	4214	4547	4438	4412	4317	4845	4819	4954	4731	4816	4752	4600.5	4374	4389	4873	4766	1.089	0.124	0.00100307	0.0474217	0.0003	0.0014	0.0008	0.0008	TRUE	0.0073
RPS27L	864	775	821	402	942	759	559	631	640	864	1158	1271	689	727	704	669	734	691	819	885	928	811	816	821	774.5	707	698	877	816	1.156	0.209	0.0010217	0.0477097	0	0.0027	0.0018	0.0018	TRUE	0.0197
C14orf166	2503	1972	2153	1410	2892	2343	1394	1633	1381	2211	3171	3346	1997	1849	1845	2347	2254	2133	2042	2290	2003	2075	2235	2162	2102.65	1897	2245	2112	2157	1.137	0.186	0.00103953	0.0480111	0.0021	0.0017	0.0019	0.0019	TRUE	0.0331
XRCC6	10148	8487	9343	4381	9726	8207	5477	5823	5676	9145	12148	13407	8098	7956	8007	7293	7580	7473	8022	8165	8232	8581	8563	8663	8052.69	8020	7449	8140	8602	1.072	0.101	0.00104117	0.0480111	0	0.0013	0.0006	0.0006	TRUE	0.0018
MRPS6	495	371	416	200	407	343	259	295	296	463	642	683	395	348	357	333	317	312	379	414	429	434	453	441	384.36	367	321	407	443	1.207	0.272	0.00106213	0.048373	0	0.0043	0.0029	0.0029	TRUE	0.0277
PAIP2	2395	1986	2175	831	1876	1559	1416	1500	1340	2182	2911	3370	1911	1862	1864	1383	1462	1420	2074	2103	1943	2047	2052	2177	1858.27	1879	1422	2040	2092	1.114	0.156	0.00109145	0.0489692	0.0005	0.0018	0.0012	0.0012	TRUE	0.0104
PSMA4	3326	2694	3040	1213	2631	2371	1810	2004	1826	3039	3983	4552	2654	2526	2605	2019	2051	2159	2651	2810	2648	2851	2807	2941	2560.25	2595	2076	2703	2866	1.105	0.144	0.00113242	0.0494378	0.0005	0.0016	0.0011	0.0011	TRUE	0.0075
PSMG1	1397	1168	1305	664	1397	1170	832	877	814	1290	1766	1983	1115	1095	1118	1105	1089	1065	1219	1230	1180	1210	1245	1281	1162.75	1109	1086	1210	1245	1.124	0.168	0.00112003	0.0494378	0	0.0022	0.0012	0.0012	TRUE	0.0039
AUP1	3342	2804	3322	1264	2440	2135	2032	1993	1985	3347	4368	4489	2667	2629	2847	2104	1902	1944	2976	2794	2879	3140	3079	2900	2655.15	2714	1983	2883	3040	1.119	0.162	0.00114134	0.0495339	0.0013	0.0016	0.0015	0.0015	TRUE	0.0151
